# Supplementary material
Source: HighWire-hosted journal article supplement (https://gut.bmj.com/content/71/3/544)
Supplement: inline-supplementary-material-11 [file inline-supplementary-material-11.xlsx]

## Sheet: Phylum
Supplementary Table 8 Gut microbiota compositional differences at phylum, genus and species level between 1 month and 6 months follow-up of composition of antibiotic-naive COVID-19 patients compared with non-COVID-19 controls.
Phylum	Mean relative abundance of follow-up at 1 month	Mean relative abundance of follow-up at 6 months	p	FDR
Firmicutes	52.3263	49.1557	0.362652	0.846188
Actinobacteria	21.744	24.7705	0.354446	0.846188
Bacteroidetes	19.6651	20.6638	0.734926	0.855054
Proteobacteria	5.86805	5.05088	0.707372	0.855054
Fusobacteria	0.105245	0.0320893	0.153303	0.846188
Synergistetes	0.0165474	0.0194172	0.855054	0.855054
Verrucomicrobia	0.17808	0.279521	0.58859	0.855054

## Sheet: Genus
Supplementary Table 6 Gut microbiota compositional differences at phylum, genus and species level between 1 month and 6 months follow-up from COVID-19 patients after virus clearance.
Genus	Mean relative abundance of follow-up at 1 month	Mean relative abundance of follow-up at 6 months	p	FDR
Bifidobacterium	15.0744	19.4863	0.159367	0.670679
Bacteroides	14.7843	15.6864	0.748214	0.823035
Blautia	12.0027	11.7534	0.923327	0.923327
Collinsella	4.86428	3.49539	0.244162	0.670679
Anaerostipes	3.66521	2.28524	0.0639981	0.670679
Eubacterium	3.58764	4.20819	0.403578	0.670679
Roseburia	3.50835	2.9886	0.608539	0.74377
Fusicatenibacter	3.02369	3.77514	0.369943	0.670679
Streptococcus	3.02071	2.39943	0.426795	0.670679
Ruminococcus	2.54068	3.06651	0.507167	0.697355
Others	33.8321	30.8289	0.317506	0.670679

## Sheet: Species
Supplementary Table 6 Gut microbiota compositional differences at phylum, genus and species level between 1 month and 6 months follow-up from COVID-19 patients after virus clearance.
Species	Mean relative abundance of follow-up at 1 month	Mean relative abundance of follow-up at 6 months	p	FDR
Bifidobacterium_adolescentis	6.31836	7.12053	0.0544284	0.576824
Ruminococcus_gnavus	6.41687	4.80758	0.463656	0.79359
Bifidobacterium_pseudocatenulatum	5.02136	4.52699	0.77484	0.906185
Collinsella_aerofaciens	4.80016	3.32521	0.206583	0.79359
Bifidobacterium_longum	4.13041	4.38015	0.853731	0.906185
Bacteroides_vulgatus	3.97982	4.87722	0.593539	0.890309
Anaerostipes_hadrus	3.6621	2.22749	0.0549356	0.576824
Fusicatenibacter_saccharivorans	3.02369	3.77514	0.369943	0.79359
Escherichia_coli	2.76897	2.67288	0.953224	0.953224
Bacteroides_uniformis	2.64162	3.1745	0.488834	0.79359
Blautia_wexlerae	2.41825	2.8037	0.705193	0.906185
Eubacterium_rectale	2.23246	2.89206	0.47049	0.79359
Faecalibacterium_prausnitzii	2.1089	2.28943	0.719759	0.906185
Dorea_longicatena	1.90869	1.62545	0.49127	0.79359
Klebsiella_pneumoniae	1.73411	0.973926	0.359312	0.79359
Roseburia_inulinivorans	1.72406	1.16379	0.386555	0.79359
Ruminococcus_bromii	1.53171	2.30183	0.269612	0.79359
Streptococcus_salivarius	1.44026	1.54268	0.822009	0.906185
Prevotella_copri	1.3988	2.40454	0.400338	0.79359
Eubacterium_hallii	1.3701	1.44186	0.863033	0.906185
Others	41.2733	37.6465	0.21548	0.79359
