# Supplementary material
Source: HighWire-hosted journal article supplement (https://gut.bmj.com/content/71/3/544)
Supplement: inline-supplementary-material-16 [file inline-supplementary-material-16.xlsx]

## Sheet: Sheet1
Species	ra	group	LDA	p	FDR
k__Bacteria_p__Bacteroidetes_c__Bacteroidia_o__Bacteroidales_f__Tannerellaceae_g__Parabacteroides_s__Parabacteroides_distasonis	4.37464	No PACS, baseline at admission	4.00381	0.00102845	0.0702515
k__Bacteria_p__Firmicutes_c__Erysipelotrichia_o__Erysipelotrichales_f__Erysipelotrichaceae_g__Erysipelatoclostridium_s__Erysipelatoclostridium_ramosum	3.33263	No PACS, baseline at admission	3.04979	0.00840873	0.0923227
k__Bacteria_p__Bacteroidetes_c__Bacteroidia_o__Bacteroidales_f__Bacteroidaceae_g__Bacteroides_s__Bacteroides_vulgatus	4.63541	No PACS, baseline at admission	4.24945	0.00850341	0.0923227
k__Bacteria_p__Firmicutes_c__Clostridia_o__Clostridiales_f__Lachnospiraceae_g__Lachnoclostridium_s__Clostridium_lavalense	2.26209	No PACS, baseline at admission	2.63973	0.0133865	0.0971065
k__Bacteria_p__Firmicutes_c__Clostridia_o__Clostridiales_f__Ruminococcaceae_g__Flavonifractor_s__Flavonifractor_plautii	3.8386	No PACS, baseline at admission	3.34574	0.0140549	0.0971065
k__Bacteria_p__Bacteroidetes_c__Bacteroidia_o__Bacteroidales_f__Bacteroidaceae_g__Bacteroides_s__Bacteroides_fragilis	4.29878	No PACS, baseline at admission	3.92065	0.0339267	0.133748
k__Bacteria_p__Fusobacteria_c__Fusobacteriia_o__Fusobacteriales_f__Fusobacteriaceae_g__Fusobacterium_s__Fusobacterium_ulcerans	2.84661	No PACS, baseline at admission	2.72302	0.0351697	0.133748
k__Bacteria_p__Bacteroidetes_c__Bacteroidia_o__Bacteroidales_f__Bacteroidaceae_g__Bacteroides_s__Bacteroides_thetaiotaomicron	4.34532	No PACS, baseline at admission	3.92402	0.0497204	0.15115
k__Bacteria_p__Actinobacteria_c__Coriobacteriia_o__Eggerthellales_f__Eggerthellaceae_g__Adlercreutzia_s__Adlercreutzia_equolifaciens	4.11256	Non-COVID-19 controls	3.7258	0.00184872	0.0702515
k__Bacteria_p__Firmicutes_c__Bacilli_o__Bacillales_f__Bacillales_unclassified_g__Gemella_s__Gemella_morbillorum	1.96275	Non-COVID-19 controls	2.63683	0.00499009	0.0923227
k__Bacteria_p__Actinobacteria_c__Actinobacteria_o__Actinomycetales_f__Actinomycetaceae_g__Actinomyces_s__Actinomyces_johnsonii	1.68713	Non-COVID-19 controls	2.78889	0.0068168	0.0923227
k__Bacteria_p__Actinobacteria_c__Coriobacteriia_o__Eggerthellales_f__Eggerthellaceae_g__Asaccharobacter_s__Asaccharobacter_celatus	3.5893	Non-COVID-19 controls	3.18727	0.00764592	0.0923227
k__Bacteria_p__Firmicutes_c__Bacilli_o__Lactobacillales_f__Streptococcaceae_g__Streptococcus_s__Streptococcus_cristatus	2.35577	Non-COVID-19 controls	2.46616	0.0128736	0.0971065
k__Bacteria_p__Actinobacteria_c__Coriobacteriia_o__Eggerthellales_f__Eggerthellaceae_g__Enterorhabdus_s__Enterorhabdus_caecimuris	2.05471	Non-COVID-19 controls	2.53527	0.0140331	0.0971065
k__Bacteria_p__Actinobacteria_c__Actinobacteria_o__Actinomycetales_f__Actinomycetaceae_g__Actinomyces_s__Actinomyces_sp_S6_Spd3	2.02661	Non-COVID-19 controls	2.7594	0.0154063	0.0975729
k__Bacteria_p__Actinobacteria_c__Actinobacteria_o__Actinomycetales_f__Actinomycetaceae_g__Actinobaculum_s__Actinobaculum_sp_oral_taxon_183	2.15957	Non-COVID-19 controls	2.59855	0.0177773	0.103929
k__Bacteria_p__Firmicutes_c__Clostridia_o__Clostridiales_f__Catabacteriaceae_g__Catabacter_s__Catabacter_hongkongensis	2.34546	Non-COVID-19 controls	2.55112	0.0202755	0.110067
k__Bacteria_p__Firmicutes_c__Clostridia_o__Clostridiales_f__Lachnospiraceae_g__Blautia_s__Blautia_obeum	4.64969	Non-COVID-19 controls	4.21689	0.0222285	0.112624
k__Bacteria_p__Proteobacteria_c__Gammaproteobacteria_o__Enterobacterales_f__Enterobacteriaceae_g__Klebsiella_s__Klebsiella_pneumoniae	3.6644	Non-COVID-19 controls	3.21193	0.0301841	0.133748
k__Bacteria_p__Firmicutes_c__Clostridia_o__Clostridiales_f__Ruminococcaceae_g__Ruminococcus_s__Ruminococcus_lactaris	3.62248	Non-COVID-19 controls	3.29281	0.0318099	0.133748
k__Bacteria_p__Proteobacteria_c__Gammaproteobacteria_o__Enterobacterales_f__Enterobacteriaceae_g__Klebsiella_s__Klebsiella_quasipneumoniae	2.77326	Non-COVID-19 controls	2.40826	0.0358756	0.133748
k__Bacteria_p__Firmicutes_c__Bacilli_o__Lactobacillales_f__Streptococcaceae_g__Streptococcus_s__Streptococcus_mitis	3.04237	Non-COVID-19 controls	2.76994	0.0412198	0.133748
k__Bacteria_p__Actinobacteria_c__Actinobacteria_o__Propionibacteriales_f__Propionibacteriaceae_g__Propionibacterium_s__Propionibacterium_acidifaciens	2.25949	Non-COVID-19 controls	2.54366	0.0422361	0.133748
k__Bacteria_p__Firmicutes_c__Clostridia_o__Clostridiales_f__Eubacteriaceae_g__Eubacterium_s__Eubacterium_sp_CAG_38	2.05652	Non-COVID-19 controls	2.62464	0.0422361	0.133748
k__Bacteria_p__Actinobacteria_c__Coriobacteriia_o__Coriobacteriales_f__Atopobiaceae_g__Olsenella_s__Olsenella_uli	1.1714	Non-COVID-19 controls	3.0741	0.0422361	0.133748
