# Supplementary material
Source: HighWire-hosted journal article supplement (https://gut.bmj.com/content/71/3/544)
Supplement: inline-supplementary-material-19 [file inline-supplementary-material-19.xlsx]

## Sheet: Sheet1
Characteristics	SumsOfSqs	MeanSqs	F.Model	R2	p_value	p.adjust
Severity	0.424432	0.424432	1.32915	0.0293221	0.126	0.886
Gender	0.316257	0.316257	0.98282	0.0218488	0.486	0.886
Age	0.300906	0.300906	0.934101	0.0207882	0.553	0.886
Ribavarin	0.29602	0.29602	0.918615	0.0204506	0.562	0.886
Antibiotic	0.271017	0.271017	0.839547	0.0187234	0.671	0.886
Co_morbidities	0.270872	0.270872	0.839089	0.0187133	0.655	0.886
Interferon	0.246286	0.246286	0.76161	0.0170148	0.78	0.886
Lopinavir/Ritonavir	0.219979	0.219979	0.679002	0.0151973	0.886	0.886
