# Supplementary material
Source: HighWire-hosted journal article supplement (https://gut.bmj.com/content/71/3/544)
Supplement: inline-supplementary-material-20 [file inline-supplementary-material-20.xlsx]

## Sheet: Sheet1
Supplementary Table 14 Multifactorial PERMANOVA (Adonis) tests for associations of different subgroups of PACS to gut microbiome communities of 6 months follow-up
Characteristics	SumsOfSqs	MeanSqs	F.Model	R2	p_value	p.adjust
Gastrointestinal	0.6247	0.62466	2.2083	0.06856	0.006	0.0072
Respiratory	0.7862	0.78624	2.699	0.06176	0.002	0.004
Fatigue	0.776	0.77605	2.5627	0.05751	0.001	0.003
Musculoskeletal	0.6622	0.66217	2.252	0.05737	0.004	0.006
Hairloss	0.5152	0.51515	1.8087	0.04914	0.013	0.013
Neurological	0.7493	0.74931	2.54	0.04414	0.001	0.003
